# Supplementary material
Source: publisher figshare collection journal article supplement (https://acs.figshare.com/ndownloader/files/13259312)
Supplement: Supplementary file 1 [file 13259312]

# Supporting Information

## Nanoscale Insight into Performance Loss Mechanisms in P3HT:ZnO Nanorod Solar Cells

Haian Qiu<sup>1</sup>, Jong Hyun Shim<sup>2</sup>, Junghyun Cho<sup>2,3</sup>, Jeffrey M. Mativetsky<sup>1,2\*</sup>

<sup>1</sup>*Department of Physics, Applied Physics, and Astronomy, Binghamton University, Binghamton, NY, 13902, USA*

<sup>2</sup>*Materials Science and Engineering Program, Binghamton University, Binghamton, NY, 13902, USA*

<sup>3</sup>*Department of Mechanical Engineering, Binghamton University, Binghamton, NY, 13902, USA*

\*Email: [jmativet@binghamton.edu](mailto:jmativet@binghamton.edu)

|                                          |     |
|------------------------------------------|-----|
| 1. Photocurrent Density Calibration..... | S-2 |
| 2. Piezo-Induced Current.....            | S-2 |
| 3. Short-Circuit Current .....           | S-4 |
| 4. Histograms.....                       | S-5 |
| 5. Saturated Photocurrent.....           | S-6 |
| 6. Charge Collection Probability.....    | S-7 |

## 1. Photocurrent Density Calibration

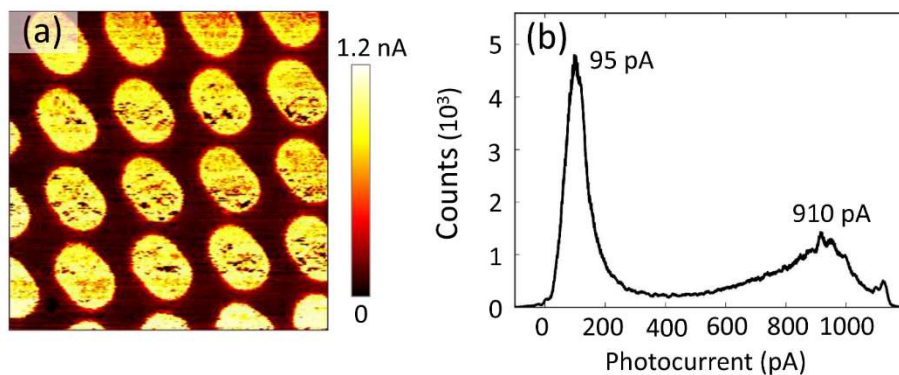

**Figure S1.** (a) Photocurrent map ( $10\ \mu\text{m} \times 10\ \mu\text{m}$ ) of a P3HT:ZnO nanorod active layer with micropatterned Au electrodes on top, measured under short circuit conditions (0 V) and 4.5 suns. The area of the micropatterned electrodes was measured to be  $1.9\ \mu\text{m}^2$  (elongated shape due to evaporation geometry). (b) Corresponding photocurrent histogram showing two distinct peaks, one peak centered at 95 pA due to direct contact between the C-AFM probe and the active layer, and another peak at 910 pA due to C-AFM probe contact to the Au microelectrodes.

## 2. Piezo-Induced Current

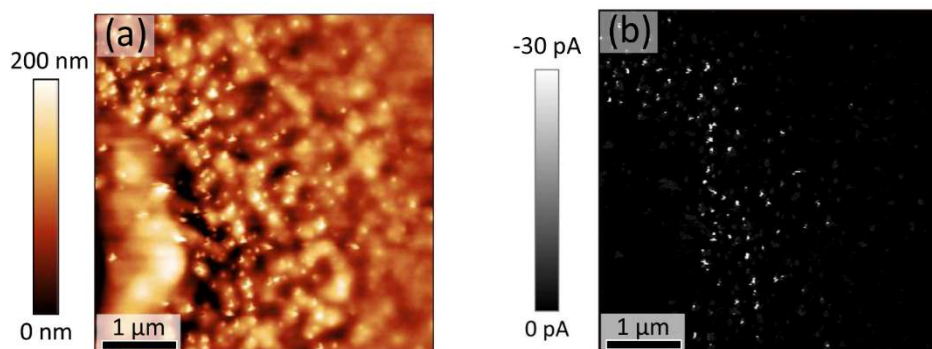

**Figure S2.** (a) Contact mode topography and (b) piezo-induced current map of a P3HT:ZnO nanorod sample with an incomplete P3HT coating, under short-circuit conditions (0 V) and 4.5 sun illumination (positive currents truncated at 0 pA). Negative piezo-induced current is clearly observed at locations where ZnO nanorods protrude.

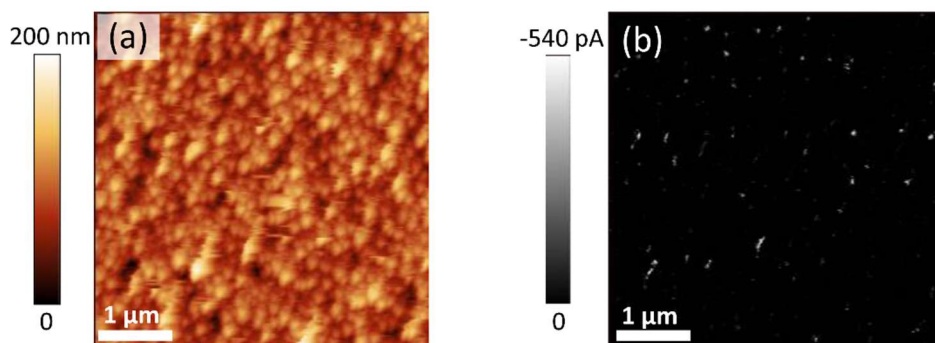

**Figure S3.** (a) Contact mode topography and (b) piezo-induced current map for a P3HT:ZnO nanorod sample with an incomplete P3HT coating, under short-circuit (0 V) and dark conditions (positive currents truncated at 0 pA).

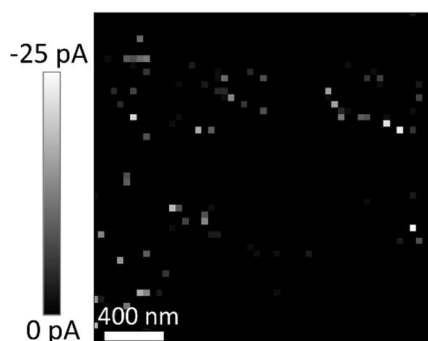

**Figure S4.** Negative piezo-induced current recorded during point-by-point current-voltage (PPIV) mapping of a P3HT:ZnO nanorod active layer under short circuit conditions and 4.5 sun illumination (sample area corresponds to Figure 4, 5 in main text, positive currents truncated at 0 pA). Piezo-induced currents were observed within the low-performance regions, indicating direct contact between the C-AFM probe and the ZnO nanorods within these regions.

### 3. Short-Circuit Current

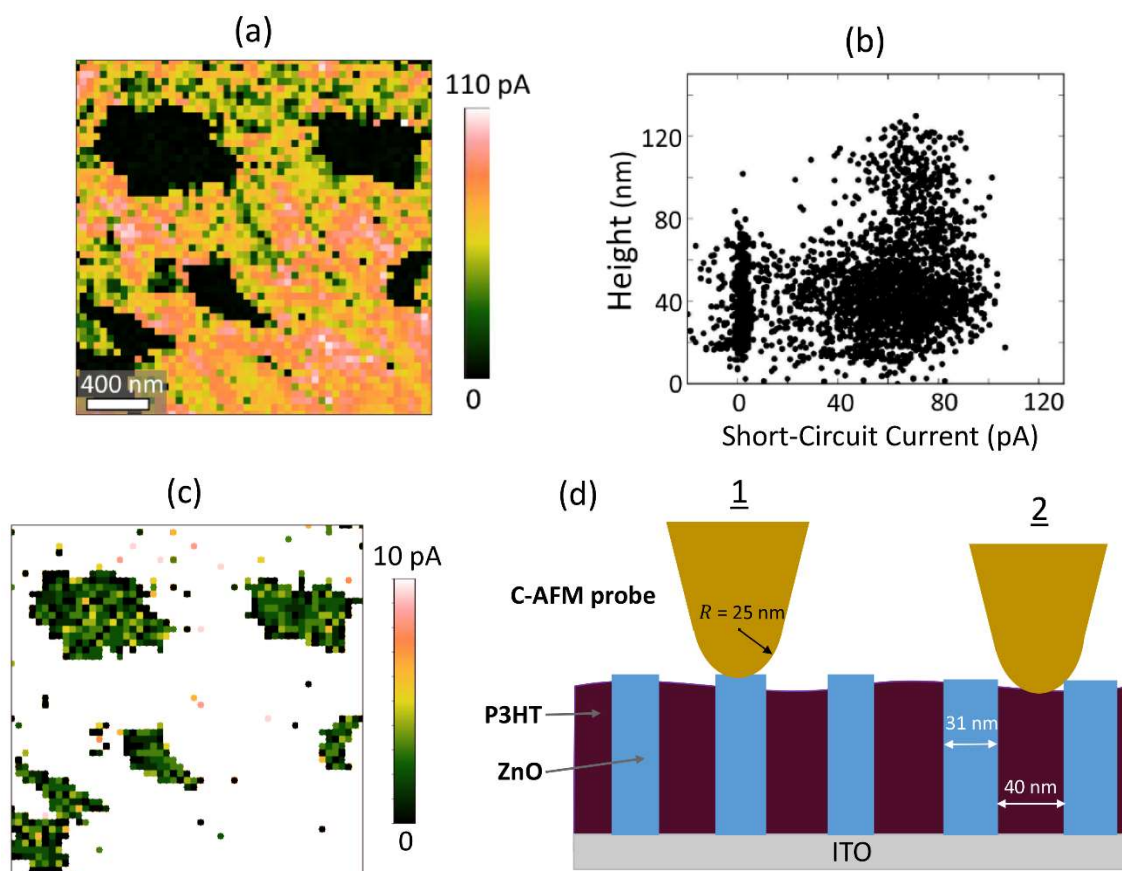

**Figure S5.** (a) Short-circuit current map of P3HT:ZnO nanorod active layer under 4.5 sun illumination (negative currents truncated at 0 pA). (b) Height versus short-circuit current scatter plot. (c) Truncated short-circuit current map with photocurrent ranging between 0 and 10 pA, showing small local photocurrent variations within the low-performance regions. (d) Schematic depicting the cause of current variations within low-lying regions. In case 1, the C-AFM probe makes direct contact with a nanorod, leading to piezo-generated current. In case 2, the probe makes contact with P3HT and a nearby nanorod simultaneously, resulting in the recombination of positive photocurrent and negative piezo-generated current.

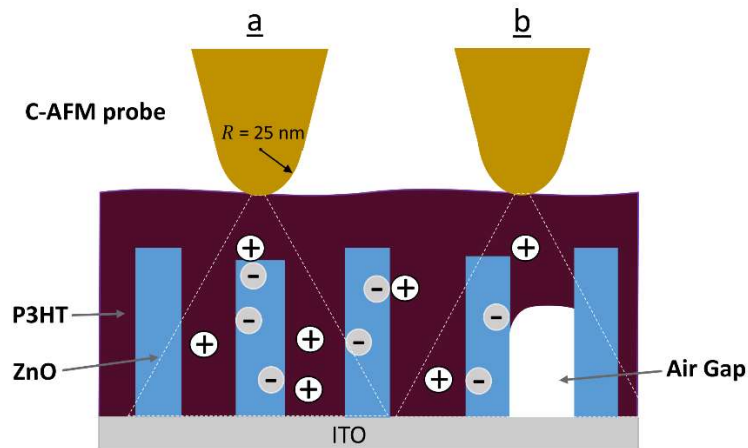

**Figure S6.** Schematic depicting (a) current spreading during C-AFM, and (b) current spreading near a buried air gap. The dashed lines represent the charge collection area which broadens at lower active layer depths. If a buried air gap were present, current spreading would lead to spatial averaging of the buried features and a gradual transition in measured current between high and low-performing regions.

#### 4. Histograms

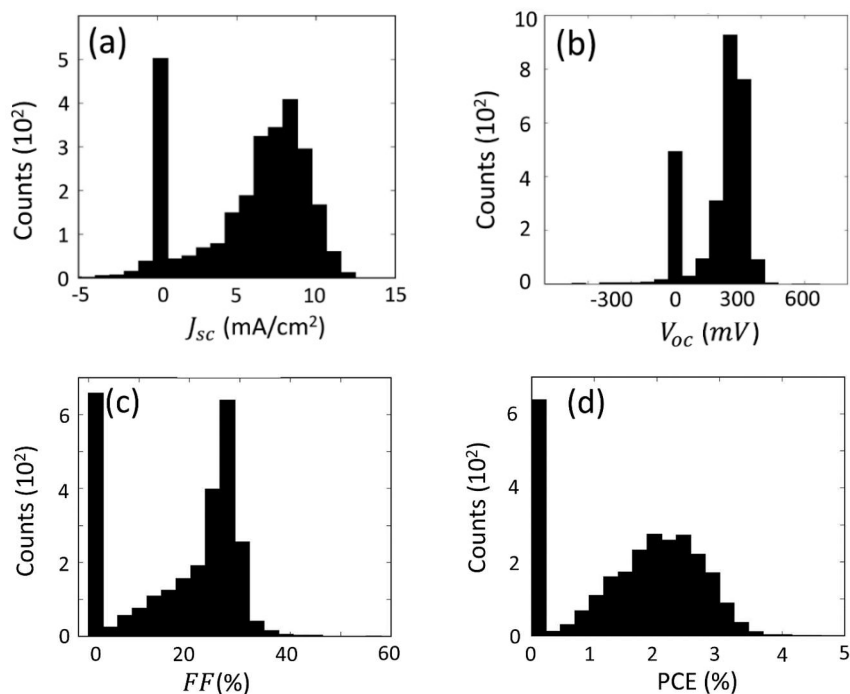

**Figure S7.** Histograms corresponding to Figure 4: (a) short-circuit current density under 1 sun illumination, (b) open-circuit voltage, (c) fill factor, and (d) power conversion efficiency.

## 5. Saturated Photocurrent

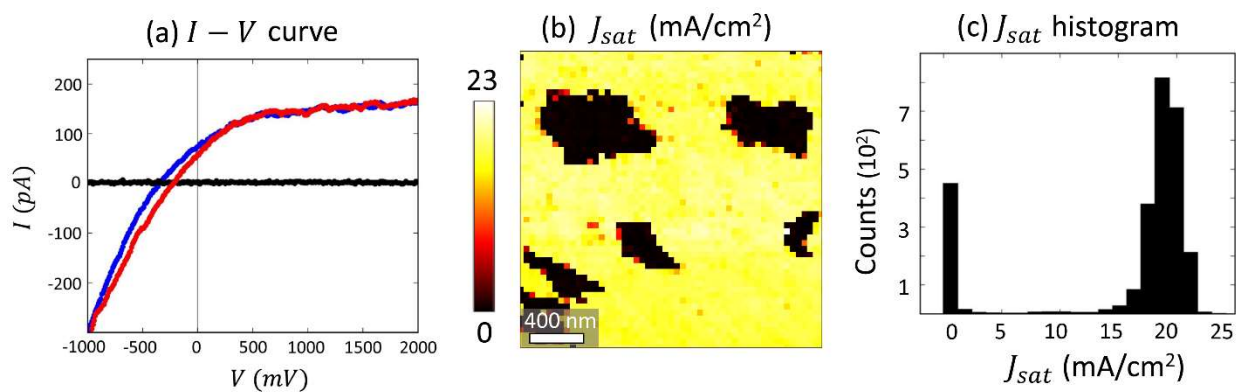

**Figure S8.** (a) Current-voltage curves showing saturated photocurrent at a reverse bias of +2 V, under 4.5 suns. (b) Saturated photocurrent density,  $J_{sat}$ , map at +2 V bias, estimated for 1 sun and (c) corresponding histogram with a peak value of 20 mA/cm<sup>2</sup>. The photocurrent density distribution in (b) is uniform, except at the low-performance regions, where there is near-zero photocurrent (negative piezo-induced current truncated at 0 mA/cm<sup>2</sup>).

## 6. Charge Collection Probability

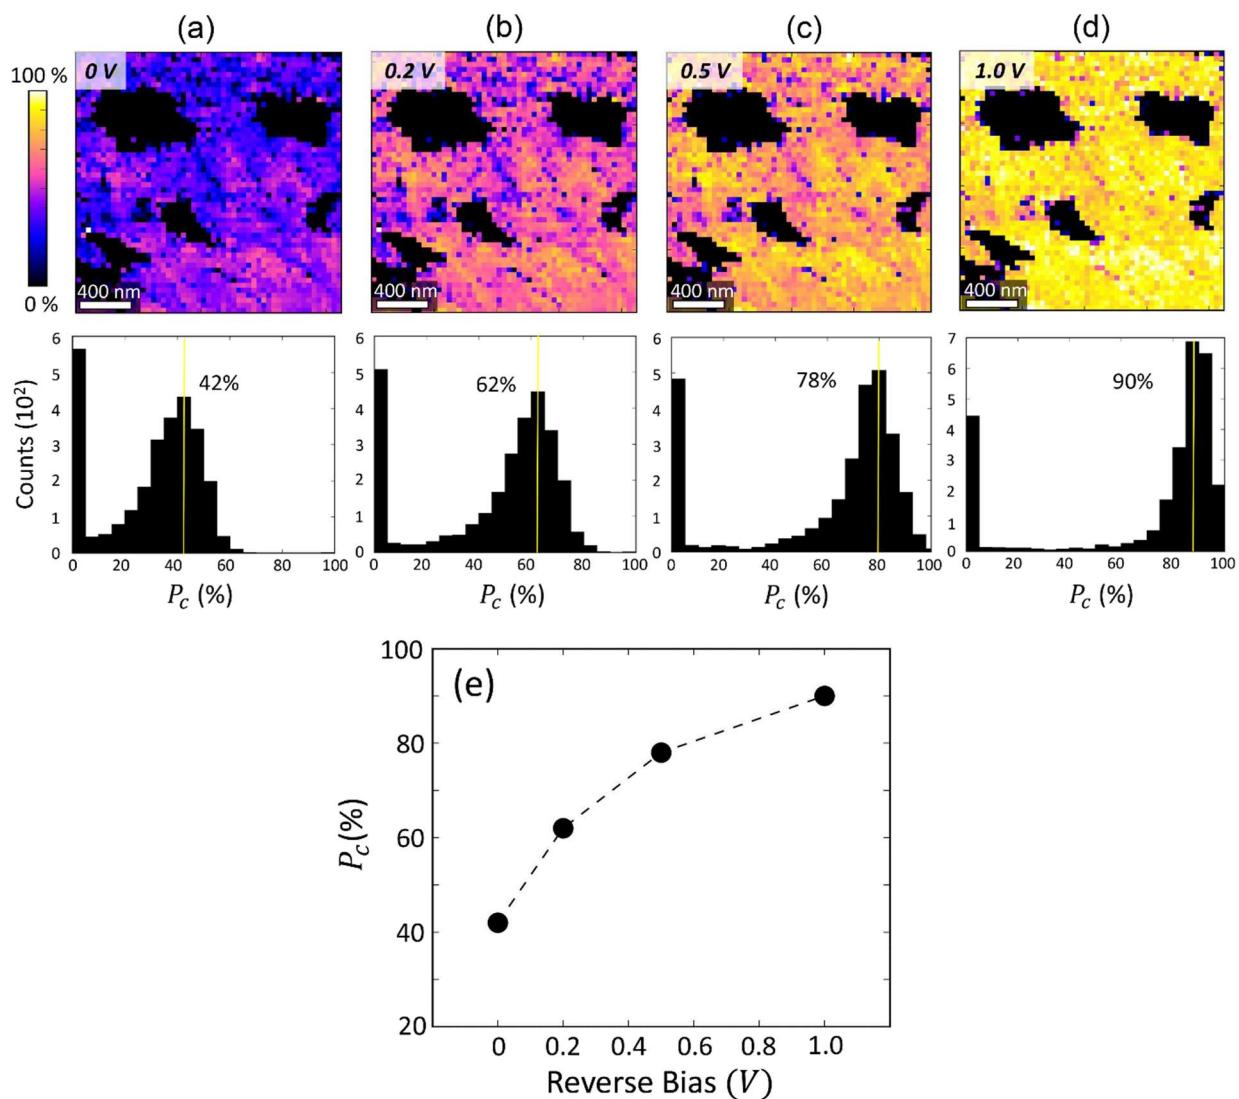

**Figure S9.** Mapped charge collection probability  $P_c$  as the reverse bias is varied: (a) 0 V, (b) 0.2 V, (c) 0.5 V, (d) 1.0 V. The corresponding histograms are shown beneath the  $P_c$  maps. (e) Charge collection probability peak values versus reverse bias. Charge collection probability increases as reverse bias increases and approaches 90% at +1 V.
